# Supplementary material for: Sensitive fluorescence detection of heparin based on self-assembly of mesoporous silica nanoparticle–gold nanoclusters with emission enhancement characteristics
Source: Royal Society of Chemistry journal article supplement (doi:10.1039/c8an01556b), 2018-01-01
Supplement: c8an01556b1.pdf [file c8an01556b1.pdf]

## ***Electronic Supplementary Information***

### **Sensitive fluorescence detection of heparin based on self-assembly of mesoporous silica nanoparticle-gold nanoclusters with emission enhancement characteristic**

Lin Ma<sup>a</sup>, Mengyue Zhang<sup>a</sup>, Aijun Yang<sup>b</sup>, Qin Wang<sup>b</sup>, Fei Qu<sup>a</sup>, Fengli Qu<sup>a</sup>, Rong-Mei Kong<sup>a,\*</sup>

*<sup>a</sup>College of Chemistry and Chemical Engineering, Qufu Normal University, Qufu Shandong 273165, P. R. China.*

*<sup>b</sup>Center for Reproductive medicine, Affiliated Hospital of Jining Medical University, Jining, Shandong 272029, P. R. China.*

\* To whom correspondence should be addressed.

E-mail: [kongrongmei@126.com](mailto:kongrongmei@126.com)

Tel/fax: (+86) 537-4456301

## **Experimental section**

### **Optimization of method**

To obtain the best performance of the method, the following parameters were optimized:

#### (1) MSNs concentrations

To investigate the effect of MSNs concentrations on the fluorescence emission enhancement of MSN-AuNCs nanocomposites, the assay was carried out by varying the concentration of MSNs in the range of 0 to 0.6 mg/mL and fixing the volume of AuNCs solution at 15  $\mu$ L in Tris-HCl buffer with the total volume of 300  $\mu$ L. The mixture was gently shaken on a thermostatic oscillator at 25 °C for 30 min, and then the fluorescence spectra were recorded with the excitation of 365 nm.

#### (2) pH values

To investigate the effect of pH values on the performance of Hep detection, the assay was carried out in Tris-HCl buffer with different pH (6.0, 6.5, 7.0, 7.5, 8.0, 8.5, 9.0). Typically, 60  $\mu$ L of MSNs solution (2 mg/mL), 165  $\mu$ L Tris-HCl buffer were mixed with 60  $\mu$ L of Hep solution (1  $\mu$ M) and incubated at 37 °C for 15 min. Then, 15  $\mu$ L of AuNCs solution was added in the as-mentioned solution and gently shaken on a thermostatic oscillator at 25 °C for 30 min. Finally, the fluorescence spectra were recorded with the excitation of 365 nm.

#### (3) Self-assembly time of MSN-AuNCs nanocomposites

To investigate the effect of self-assemble time of MSN-AuNCs nanocomposites on the performance of Hep detection, the assay was carried out by varying the self-assemble time of AuNCs with MSNs under a fixed concentration of MSNs at 0.4 mg/mL and a fixed volume of AuNCs solution at 15  $\mu$ L in Tris-HCl buffer with the total volume of 300  $\mu$ L. The mixture was gently shaken on a thermostatic oscillator at 25 °C for 30 min, and then the fluorescence spectra were recorded with the excitation of 365 nm.

#### (4) Hep incubation time

To investigate the effect of Hep incubation time on the performance of Hep

detection, the assay was carried out in Tris-HCl buffer with different Hep incubation time. The other experimental conditions and procedure were the same as the experimental section (2).

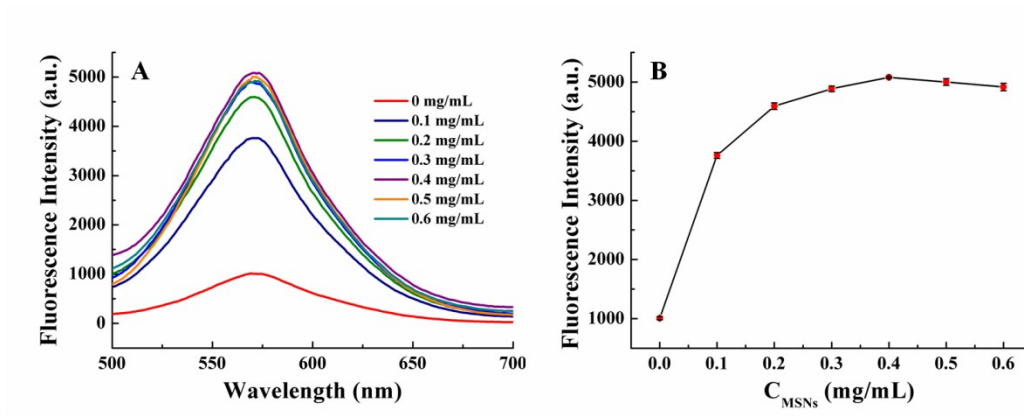

**Fig. S1.** Effect of the MSNs concentration on the emission enhancement of MSN-AuNCs nanocomposites. (A) Fluorescence emission responses of MSN-AuNCs nanocomposites obtained by varying the concentration of MSNs under a fixed volume of 15  $\mu$ L AuNCs solution in Tris-HCl buffer. (B) Fluorescence intensities at 570 nm to different concentration of MSNs. The error bars were estimated from three replicate measurements.

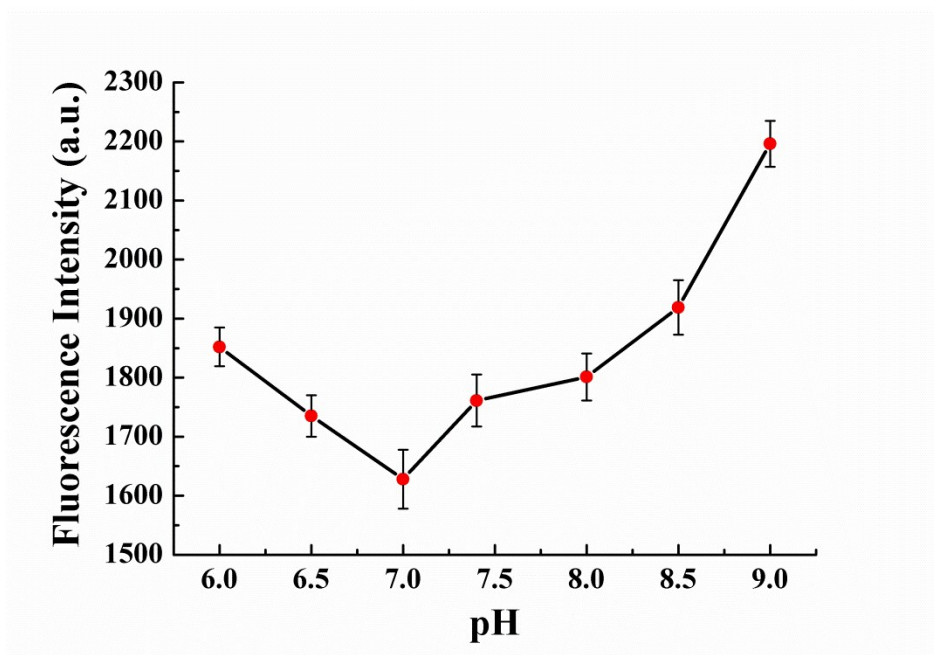

**Fig. S2.** Effect of the pH on the performance of the method for Hep detection,  $V_{\text{AuNCs}} = 15 \mu\text{L}$ ,  $[\text{Hep}] = 200 \text{ nM}$ ,  $[\text{MSNs}] = 0.4 \text{ mg/mL}$ . The error bars were estimated from three replicate measurements.

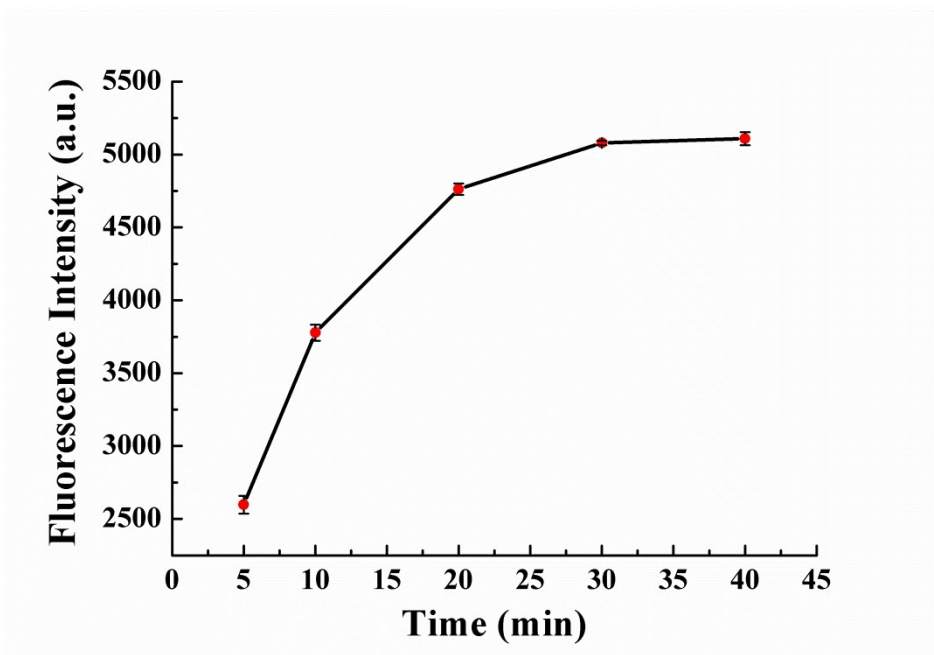

**Fig. S3.** Effect of the self-assembly time on the emission enhancement of MSN-AuNCs nanocomposites,  $V_{\text{AuNCs}}=15 \mu\text{L}$ ,  $[\text{MSNs}] = 0.4 \text{ mg/mL}$ . The error bars were estimated from three replicate measurements.

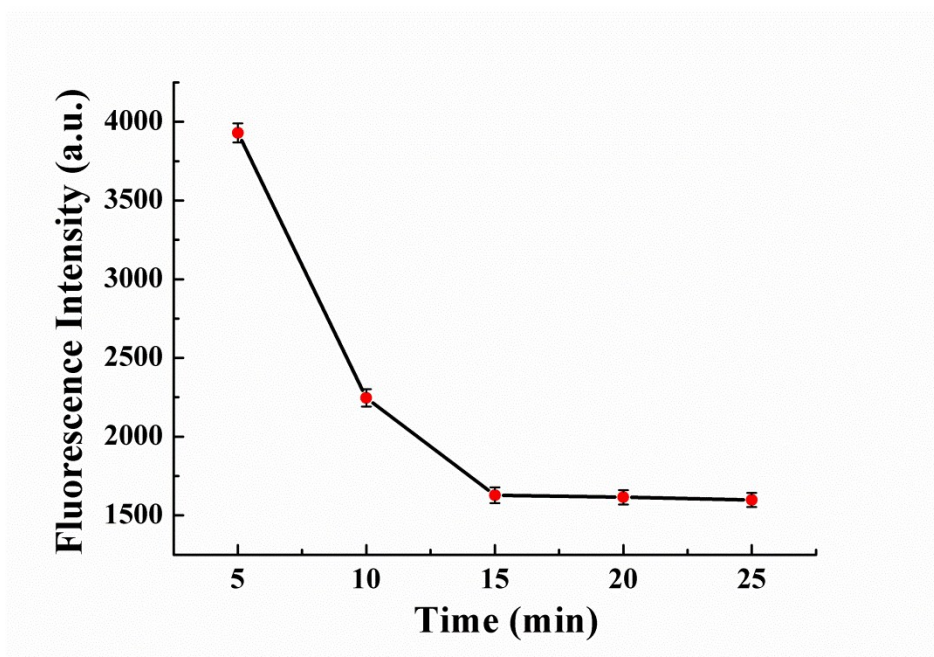

**Fig. S4.** Effect of incubation time of Hep with MSNs on the performance of the method for detection of Hep,  $V_{\text{AuNCs}}=15 \mu\text{L}$ ,  $[\text{Hep}] = 200 \text{ nM}$ ,  $[\text{MSNs}] = 0.4 \text{ mg/mL}$ . The error bars were estimated from three replicate measurements.

**Table S1.** Comparison of various fluorescence methods for the detection of Hep.

| Probe                                                         | Linear range          | Detection limit | Ref.      |
|---------------------------------------------------------------|-----------------------|-----------------|-----------|
| Phloxine B/tetraphenylethene (TPE) derivative and protamine   | 0–1.5 U/mL            | 0.02 U/mL       | 1         |
| AIE-based fluorescent probe (TIBI)                            | 0–10 $\mu$ M          | 8 nM            | 2         |
| AIE-based fluorescent probe (HPQ-TBP-I)                       | 1.7–10 $\mu$ M        | 22 nM           | 3         |
| AIE-based fluorescent probe (TPE-1)                           | 0.064–0.32 $\mu$ g/mL | 3.8 ng/mL       | 4         |
| AIE-based fluorescent probe/ GO                               | 0–13.2 $\mu$ M        | 10 nM           | 5         |
| Adenosine-based molecular beacons                             | 10–100 nM             | 3 nM            | 6         |
| Polyelectrolyte-induced pyrene excimers                       | 0.1–2.3 $\mu$ M       | 0.14 $\mu$ M    | 7         |
| BSA-AuNCs /NH <sub>2</sub> -graphene oxide (GO)               | 0.1–30 $\mu$ g/mL     | 40 ng/mL        | 8         |
| Polyethyleneimine capped Ag <sub>2</sub> S quantum dots (QDs) | 0.069–2.275 $\mu$ M   | 6 nM            | 9         |
| Trypsin stabilized AuNCs                                      | 0.1–4.0 $\mu$ g/mL    | 0.05 $\mu$ g/mL | 10        |
| Poly (amidoanime) dendrimers/graphene quantum dots            | 0.04–1.6 $\mu$ g/mL   | 0.02 $\mu$ g/mL | 11        |
| CuInS <sub>2</sub> QDs                                        | 0.05–15 $\mu$ M       | 12.46 nM        | 12        |
| MSN-AuNCs                                                     | 5–150 nM              | 2 nM            | this work |

## References

- [1] L. Zhao, T. Wang, Q. Wu, Y. Liu, Z. J. Chen, X. H. Li, Fluorescent strips of electrospun fibers for ratiometric sensing of serum heparin and urine trypsin, *ACS Appl. Mater. Interfaces* 9 (2017): 3400–3410.
- [2] S. Yang, T. Gao, J. Dong, H. Xu, F. Gao, Q. Chen, Y. Gu, W. Zeng, A novel water-soluble AIE-based fluorescence probe with red emission for the sensitive detection of heparin in aqueous solution and human serum samples, *Tetrahedron Lett.* 58 (2017): 3681–3686.
- [3] S. W. Li, M. Gao, S. X. Wang, R. R. Hu, Z. J. Zhao, A. J. Qin, B. Z. Tang, Light up detection of heparin based on aggregation-induced emission and synergistic counter ion displacement, *Chem. Commun.* 53 (2017): 4795–4798.
- [4] Y. B. Ding, L. L. Shi, H. Wei, A “turn on” fluorescent probe for heparin and its oversulfated chondroitin sulfate contaminant, *Chem. Sci.* 6 (2015): 6361–6366.
- [5] R. K. Kwok, J. L. Geng, J. Y. Lam, E. G. Zhao, G. Wang, R. Y. Zhan, B. Liu, B. Z. Tang, Water-soluble bioprobes with aggregation-induced emission characteristics for light-up sensing of heparin, *J. Mater. Chem. B*, 2 (2014): 4134–4141.



- [6] C.Y. Kuo, W.L. Tseng, Adenosine-based molecular beacons as light-up probes for sensing heparin in plasma, *Chem. Commun.* 49(2013): 4607-4609.
- [7] Y. Qiao, Z. Yao, W. Ge, L. Zhang, H.C. Wu, Rapid and visual detection of heparin based on the disassembly of polyelectrolyte-induced pyrene excimers, *Org. Biomol. Chem.* 15(2017): 2569-2574.
- [8] J. Lan, H.Y. Zou, Q. Wang, P. Zeng, Y.F. Li, C.Z. Huang, Sensitive and selective turn off-on fluorescence detection of heparin based on the energy transfer platform using the BSA-stabilized Au nanoclusters/amino-functionalized graphene oxide hybrids, *Talanta* 161(2016): 482-488.
- [9] D. Yan, Y. He, Y. Ge, G. W. Song, Fluorescence "turn on-off" detection of heparin and heparinase I based on the near-infrared emission polyethyleneimine capped Ag<sub>2</sub>S quantum dots, *Sens. Actuators. B* 240 (2017): 863-869.
- [10] J.M. Liu, J.T. Chen and X.P. Yan, Near infrared fluorescent trypsin stabilized gold nanoclusters as surface plasmon enhanced energy transfer biosensor and in vivo cancer imaging bioprobe, *Anal. Chem.* 85(2013): 3238-3245.
- [11] Y. Li, H. Sun, F. Shi, N. Cai, L. Lu and X. Su, Multi-positively charged dendrimeric nanoparticles induced fluorescence quenching of graphene quantum dots for heparin and chondroitin sulfate detection, *Biosens. Bioelectron.* 74(2015): 284-290.
- [12] Z. Liu, Q. Ma, X. Wang, Z. Lin, H. Zhang, L. Liu and X. Su, Multi-positively charged dendrimeric nanoparticles induced fluorescence quenching of graphene quantum dots for heparin and chondroitin sulfate detection, *Biosens. Bioelectron.* 54(2014): 617-622.
